# Supplementary material
Source: MDPI journal article supplement (https://www.mdpi.com/2073-4352/12/1/8)
Supplement: s1 [file s1]

## Supplementary Materials

**Table S1.** R<sup>2</sup> of fDNN with 1-3 hidden layer and 9–16 neurons from 10-fold cross-validation.

| Layer number | Hidden neurons |      |      |      |      |      |      |      |
|--------------|----------------|------|------|------|------|------|------|------|
|              | 9              | 10   | 11   | 12   | 13   | 14   | 15   | 16   |
| 1            | 0.48           | 0.46 | 0.46 | 0.69 | 0.69 | 0.69 | 0.69 | 0.44 |
| 2            | 0.61           | 0.6  | 0.59 | 0.58 | 0.58 | 0.8  | 0.59 | 0.58 |
| 3            | 0.59           | 0.56 | 0.53 | 0.7  | 0.65 | 0.56 | 0.6  | 0.61 |

**Table S2.** The hyperparameter of fDNN: random forest and neural network.

| Random Forest         |          |
|-----------------------|----------|
| bootstrap             | TRUE     |
| criterion             | MSE      |
| max_depth             | None     |
| max_features          | auto     |
| max_leaf_nodes        | None     |
| max_samples           | None     |
| min_impurity_decrease | 0        |
| min_impurity_split    | None     |
| min_samples_leaf      | 1        |
| min_samples_split     | 2        |
| n_estimators          | 65       |
| oob_score             | FALSE    |
| random_state          | 42       |
| verbose               | 0        |
| Neural Network        |          |
| activation            | relu     |
| alpha                 | 0.001    |
| batch_size            | auto     |
| early_stopping        | FALSE    |
| epsilon               | 1.00E-08 |
| hidden_layer_sizes    | (2, 14)  |
| learning_rate         | constant |
| learning_rate_init    | 0.0001   |
| max_fun               | 15000    |
| max_iter              | 50000    |
| momentum              | 0.9      |

|                     |        |
|---------------------|--------|
| random_state        | 42     |
| shuffle             | TRUE   |
| solver              | adam   |
| tol                 | 0.0001 |
| validation_fraction | 0.1    |
| verbose             | 20     |

The detailed definitions of each hyperparameter can be found in: <https://scikit-learn.org/stable/index.html>

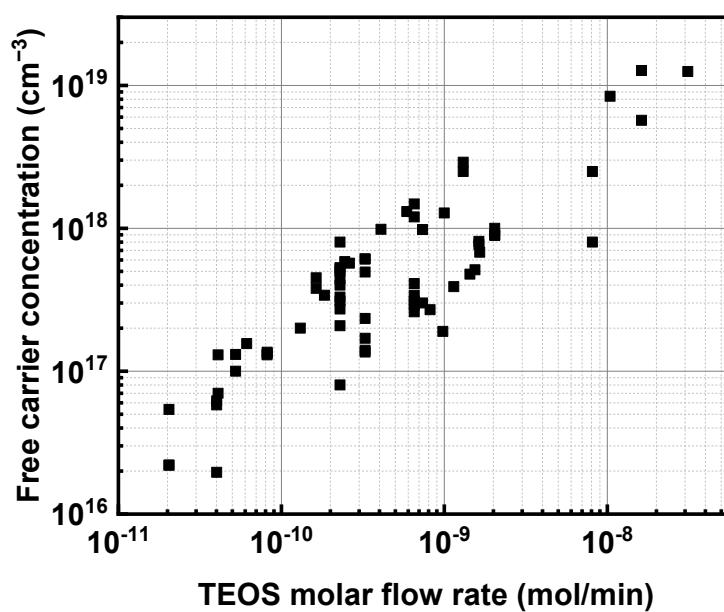

**Figure S1.** The correlation between the TEOS flow rate (mol/min) and the free carrier concentration measured by Hall effect measurement.
